# Supplementary figures and images for: Numerical Simulations of Calcium Sulphate Scaling in Full-Scale Brackish Water Reverse Osmosis Pressure Vessels Using Computational Fluid Dynamics
Source: MDPI journal article supplement (doi:10.3390/membranes11070521), 2021-07-11

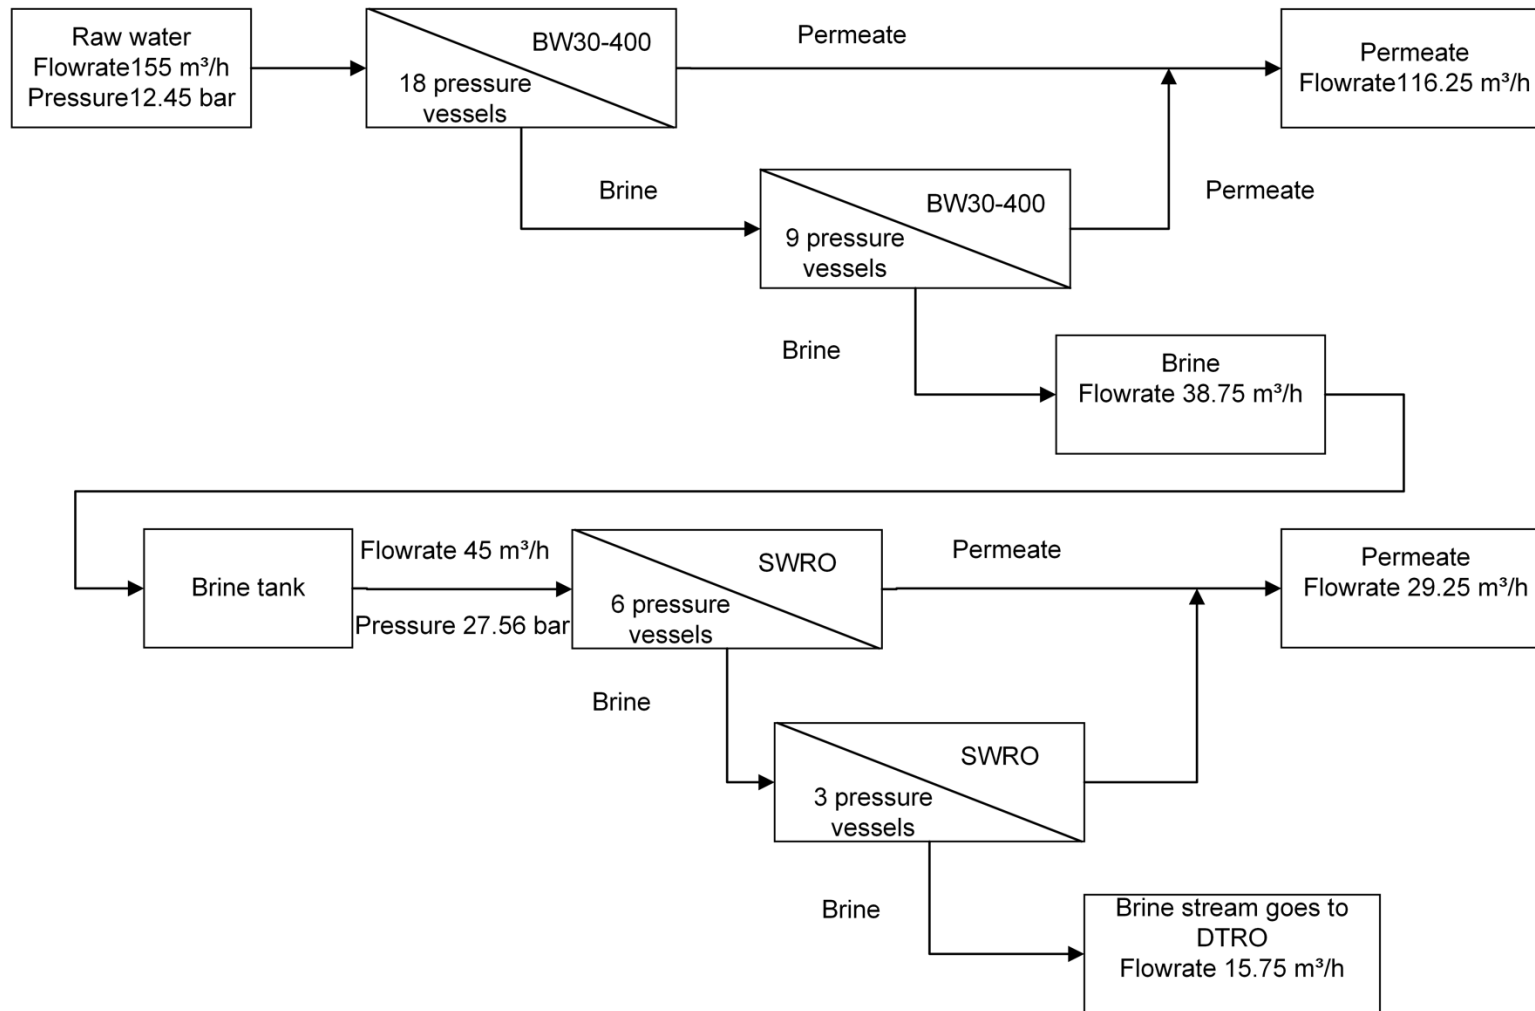

Figure S1 Flow process diagram of BWRO and SWRO processes designed for the coal mine site

Supplement: s1 [file s1]
